# Supplementary material for: Reactive oxygen species-responsive clicked assembly of gold nanoparticles to enhance photothermal therapy
Source: Royal Society of Chemistry journal article supplement (doi:10.1039/d3tb00500c), 2023-01-01
Supplement: d3tb00500c1.pdf [file d3tb00500c1.pdf]

# Reactive oxygen species-responsive clicked assembly of gold nanoparticles to enhance photothermal therapy

Hoai-Thuong Duc Bui<sup>a</sup>, Yeonju Park<sup>b</sup>, Young Mee Jung<sup>b</sup>, Hyuk Sang Yoo<sup>a,c,\*</sup>

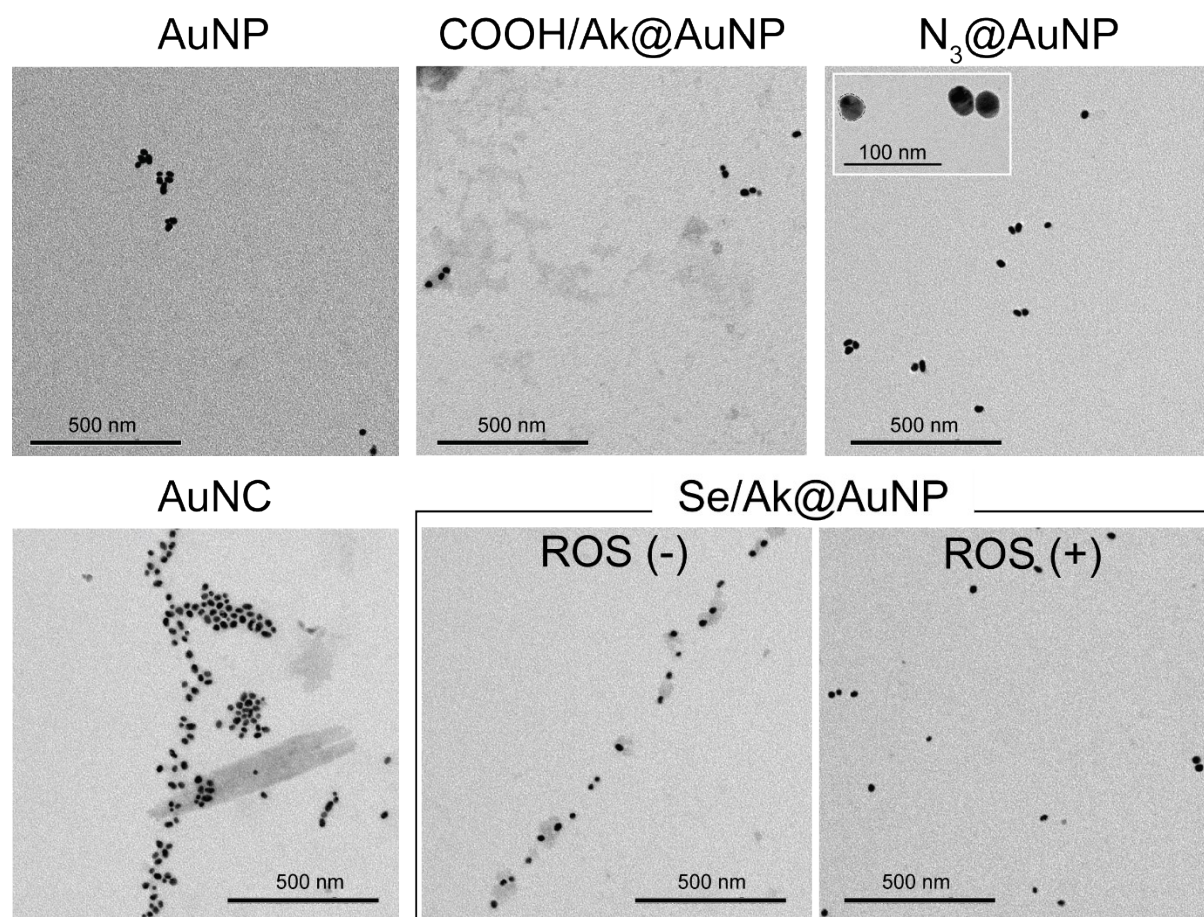

**Figure S1.** TEM images of AuNP, COOH/Ak@AuNP, N<sub>3</sub>@AuNP, Se/Ak@AuNP and AuNC at lower magnification. Samples were diluted to avoid the overlapping of nanoparticles.

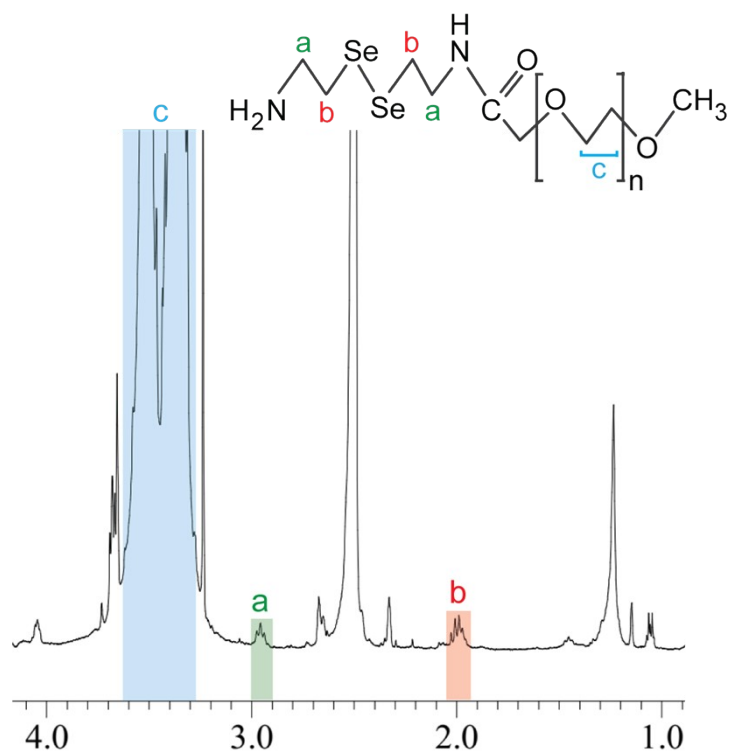

**Figure S2.** NMR spectrum of mPEG-Se conjugates. Methylene groups of selenocystamine at 2.95 – 2.88 and 1.99 – 1.91 ppm, and methylene group of mPEG-NHS at 3.60 – 3.21 ppm were observed on the spectrum of mPEG-Se.

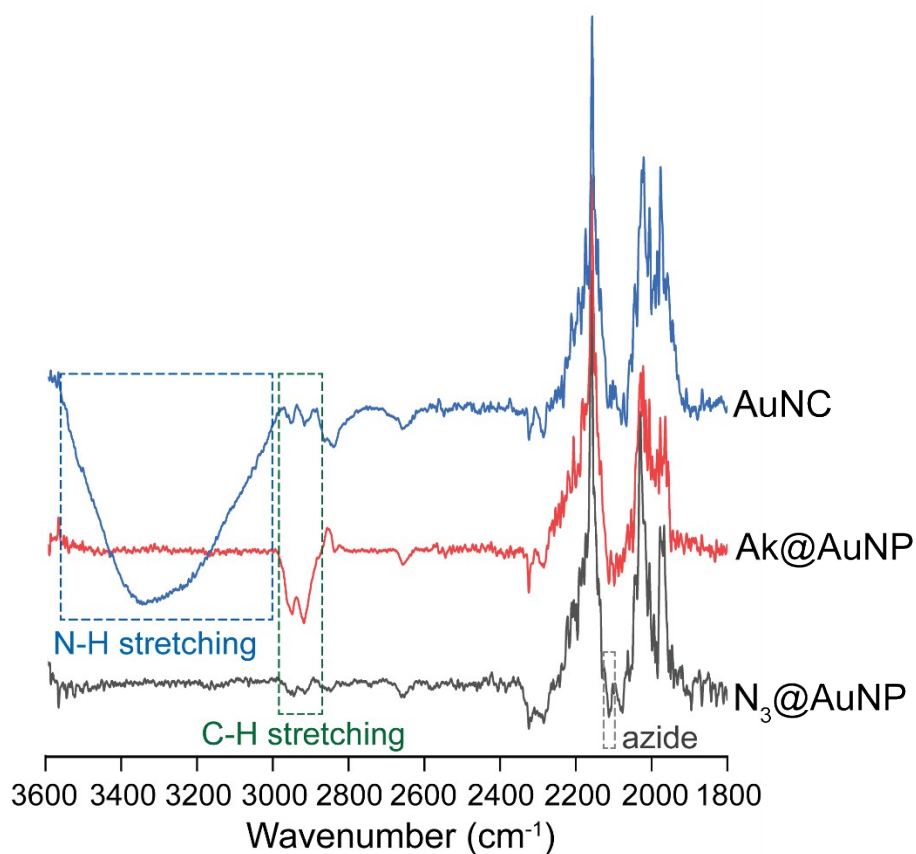

**Figure S3.** FT-IR spectra of N<sub>3</sub>@AuNP, Ak@AuNP and AuNC. The presence of azide peak at 2112 cm<sup>-1</sup> on N<sub>3</sub>@AuNP spectrum, which was significantly decreased on AuNC spectrum, and the newly appeared peak of N-H in the range of 3500 – 2900 cm<sup>-1</sup> of AuNC spectrum could indicate successful click reaction.

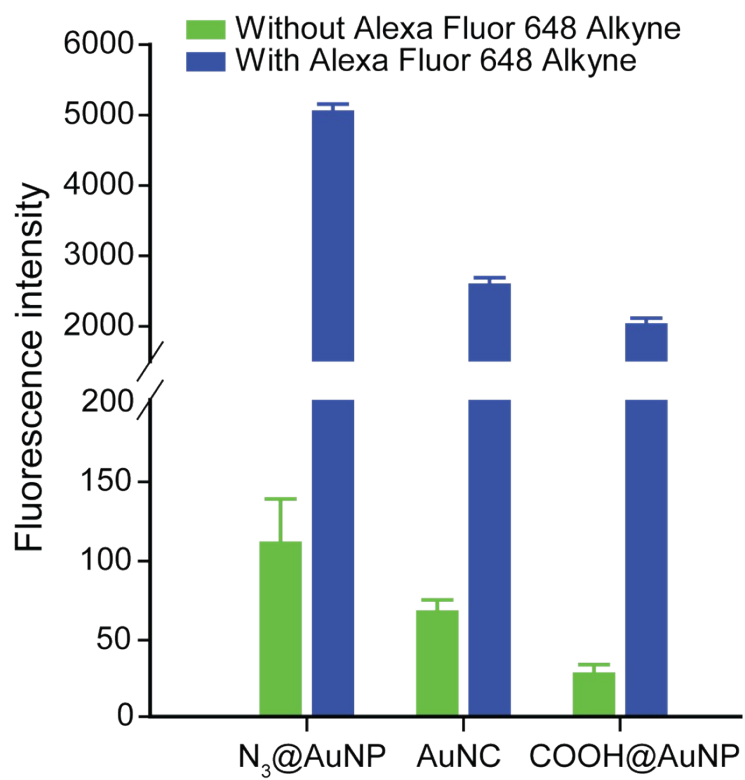

**Figure S4.** Fluorescence intensities of N<sub>3</sub>@AuNP, AuNC and COOH@AuNP after 3-h reaction with fluorescent dye Alexa Fluor 648 Alkyne in the presence of 0.1 mM CuSO<sub>4</sub> and 1 mM sodium ascorbate.

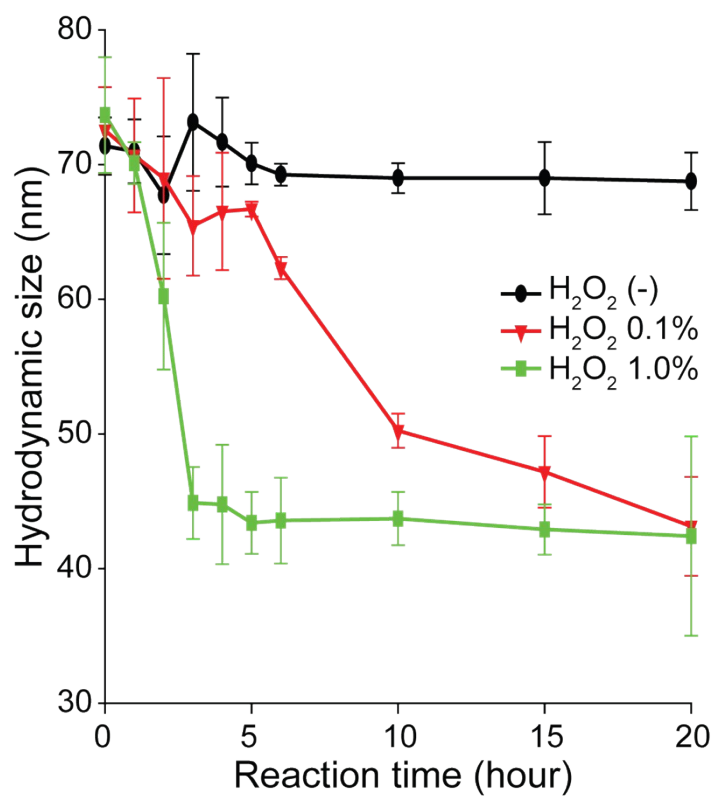

**Figure S5.** The effect of different concentrations of H<sub>2</sub>O<sub>2</sub> solution and reaction times in the oxidation of diselenide linkers of Se/Ak@AuNPs. The reaction time was kept up to 20 h.

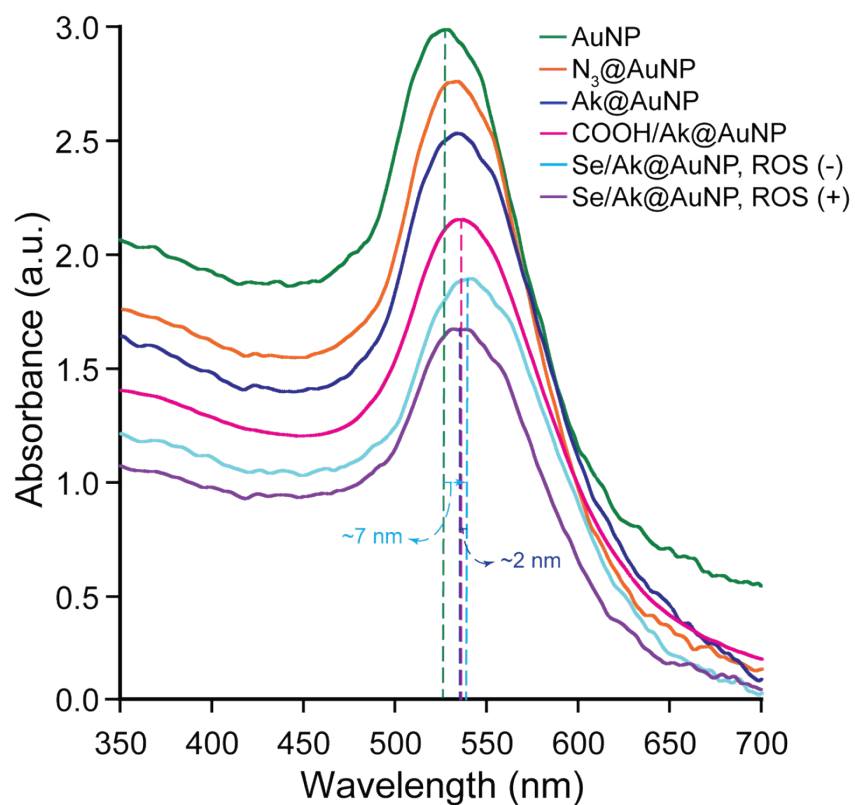

**Figure S6.** Absorbance spectrum of H<sub>2</sub>O<sub>2</sub>-oxidized Se/Ak@AuNPs exhibited a blue-shift of 2 nm compared to that of Se/Ak@AuNPs and closed to the peak of COOH/Ak@AuNPs at around 531 nm.

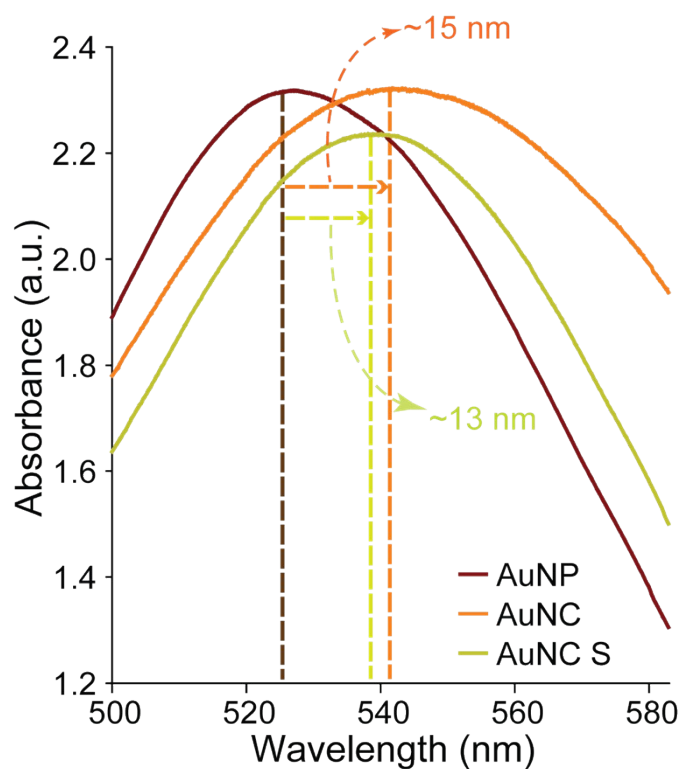

**Figure S7.** The absorbance of AuNC S (prepared by the reaction of Se/Ak@AuNPs and N<sub>3</sub>@AuNPs (molar ratio = 10 : 1) in the presence of 0.1% of H<sub>2</sub>O<sub>2</sub> and 5 mM CuSO<sub>4</sub> for 45 min) in comparison with AuNCs (prepared by the reaction between N<sub>3</sub>@AuNPs and Ak@AuNPs (molar ratio = 1 : 1) in the presence of 0.375 mM of CuSO<sub>4</sub>). The peak of AuNCs S was shifted to 539 nm which was similar to that of AuNCs at 542 nm compared with 526 nm of the peak of bare AuNPs.

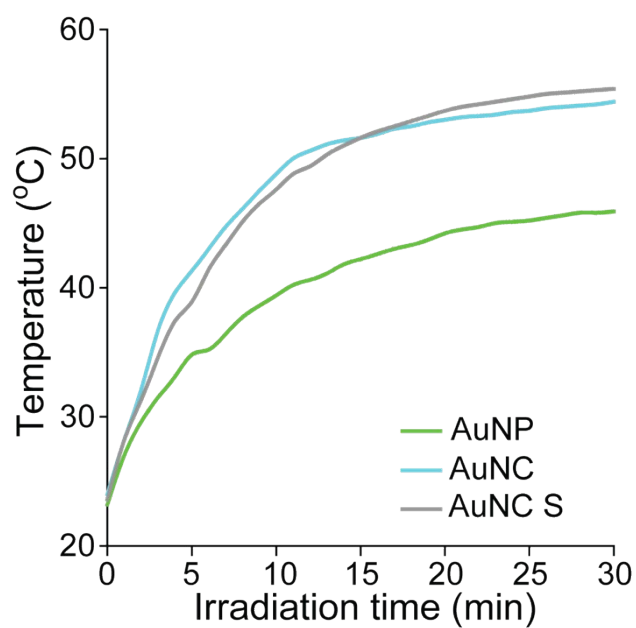

**Figure S8.** The photothermal conversion efficiency of AuNCs S compared to AuNCs. Au conc. was 0.1 mg/mL and laser power was 1 W/ cm<sup>2</sup>. AuNCs were prepared by the reaction between Ak@AuNPs and N<sub>3</sub>@AuNPs in the presence of 0.375 mM CuSO<sub>4</sub>. AuNCs S were prepared by the reaction between Se/Ak@AuNPs and N<sub>3</sub>@AuNPs in the presence of 0.1% H<sub>2</sub>O<sub>2</sub> and 5 mM CuSO<sub>4</sub>.
